# Supplementary material
Source: HighWire-hosted journal article supplement (https://bmjopen.bmj.com/content/10/12/e040865)
Supplement: inline-supplementary-material-3 [file inline-supplementary-material-3.pdf]

Supplementary Table S3 Comparison of all related variables among university students in different cities

| Characteristics               | Shantou<br>(n=2123)<br>median, IQR | Jinan<br>(n=1267)<br>median, IQR | Xi'an<br>(n=714)<br>median, IQR | Nanchang<br>(n=1237)<br>median, IQR | $\chi^2/F^*$         |
|-------------------------------|------------------------------------|----------------------------------|---------------------------------|-------------------------------------|----------------------|
| Domestic/work/study           |                                    |                                  |                                 |                                     |                      |
| VPA                           |                                    |                                  |                                 |                                     |                      |
| Frequency, day/week           | 0 (0, 0)                           | 0 (0, 1)                         | 0 (0, 1)                        | 0 (0, 1)                            | 110.025 <sup>3</sup> |
| Duration, min/day             | 0 (0, 0)                           | 0 (0, 10)                        | 0 (0, 20)                       | 0 (0, 10)                           | 87.325 <sup>3</sup>  |
| MPA                           |                                    |                                  |                                 |                                     |                      |
| Frequency, day/week           | 1 (0, 2)                           | 1 (0, 3)                         | 1 (0, 2)                        | 0 (0, 3)                            | 39.878 <sup>3</sup>  |
| Duration, min/day             | 10 (0, 30)                         | 15 (0, 30)                       | 10 (0, 30)                      | 0 (0, 30)                           | 28.091 <sup>3</sup>  |
| Transportation                |                                    |                                  |                                 |                                     |                      |
| Frequency, day/week           | 5 (2, 7)                           | 5 (2, 7)                         | 2 (1, 5)                        | 5 (0, 5)                            | 63.323 <sup>3</sup>  |
| Duration, min/day             | 30 (10, 40)                        | 30 (15, 50)                      | 30 (15, 60)                     | 30 (0, 45)                          | 20.658 <sup>3</sup>  |
| Sports and leisure time       |                                    |                                  |                                 |                                     |                      |
| VPA                           |                                    |                                  |                                 |                                     |                      |
| Frequency, day/week           | 0 (0, 1)                           | 0 (0, 1)                         | 0 (0, 1)                        | 0 (0, 1)                            | 31.724 <sup>3</sup>  |
| Duration, min/day             | 0 (0, 15)                          | 0 (0, 30)                        | 0 (0, 20)                       | 0 (0, 10)                           | 41.852 <sup>2</sup>  |
| MPA                           |                                    |                                  |                                 |                                     |                      |
| Frequency, day/week           | 0 (0, 2)                           | 1 (0, 3)                         | 1 (0, 2)                        | 0 (0, 1)                            | 112.709 <sup>3</sup> |
| Duration, min/day             | 0 (0, 30)                          | 20 (0, 30)                       | 10 (0, 30)                      | 0 (0, 10)                           | 181.535 <sup>3</sup> |
|                               | n (%)                              | n (%)                            | n (%)                           | n (%)                               |                      |
| Grade                         |                                    |                                  |                                 |                                     | 515.974 <sup>3</sup> |
| Year 1                        | 698 (32.9)                         | 453 (35.8)                       | 432 (60.5)                      | 791 (63.9)                          |                      |
| Year 2                        | 691 (32.5)                         | 443 (35.0)                       | 180 (25.2)                      | 344 (27.8)                          |                      |
| Year 3                        | 734 (34.6)                         | 371 (29.3)                       | 102 (14.3)                      | 102 (8.2)                           |                      |
| Gender                        |                                    |                                  |                                 |                                     | 441.055 <sup>3</sup> |
| Male                          | 569 (26.8)                         | 337 (26.6)                       | 165 (23.1)                      | 719 (58.1)                          |                      |
| Female                        | 1554 (73.2)                        | 930 (73.4)                       | 549 (76.9)                      | 518 (41.9)                          |                      |
| Residence type                |                                    |                                  |                                 |                                     | 204.376 <sup>3</sup> |
| Dormitory                     | 1511 (71.2)                        | 1050 (82.9)                      | 393 (55.0)                      | 816 (66.0)                          |                      |
| Home                          | 587 (27.6)                         | 210 (16.6)                       | 309 (43.3)                      | 385 (31.1)                          |                      |
| Other                         | 25 (1.2)                           | 7 (0.6)                          | 12 (1.7)                        | 36 (2.9)                            |                      |
| Sports team member            |                                    |                                  |                                 |                                     | 16.045 <sup>2</sup>  |
| No                            | 1861 (87.7)                        | 1096 (86.5)                      | 659 (92.3)                      | 1098 (88.8)                         |                      |
| Yes                           | 262 (12.3)                         | 171 (13.5)                       | 55 (7.7)                        | 139 (11.2)                          |                      |
| Chronic disease/symptom       |                                    |                                  |                                 |                                     | 72.979 <sup>3</sup>  |
| No                            | 2028 (95.5)                        | 1226 (96.8)                      | 681 (95.4)                      | 1109 (89.7)                         |                      |
| Yes                           | 95 (4.5)                           | 41 (3.2)                         | 33 (4.6)                        | 128 (10.3)                          |                      |
| Sleep duration, n (%)         |                                    |                                  |                                 |                                     | 193.604 <sup>1</sup> |
| <6 hours/day                  | 110 (5.2)                          | 58 (4.6)                         | 68 (9.5)                        | 152 (12.3)                          |                      |
| 6 to <7 hours/day             | 365 (17.2)                         | 158 (12.5)                       | 70 (9.8)                        | 264 (21.3)                          |                      |
| 7 to <8 hours/day             | 841 (39.6)                         | 608 (48.0)                       | 260 (36.4)                      | 444 (35.9)                          |                      |
| 8 to <9 hours/day             | 563 (26.5)                         | 353 (27.9)                       | 236 (33.1)                      | 288 (23.3)                          |                      |
| ≥9 hours/day                  | 244 (11.5)                         | 90 (7.0)                         | 80 (11.2)                       | 89 (7.2)                            |                      |
| Sedentary behavior, n (%)     |                                    |                                  |                                 |                                     | 748.383 <sup>3</sup> |
| <4 hours/day                  | 537 (25.3)                         | 298 (23.5)                       | 306 (42.9)                      | 792 (64.0)                          |                      |
| 4 to <6 hours/day             | 157 (7.4)                          | 79 (6.2)                         | 62 (8.7)                        | 99 (8.0)                            |                      |
| 6 to <9 hours/day             | 146 (6.9)                          | 118 (9.3)                        | 78 (10.9)                       | 86 (7.0)                            |                      |
| 9 to <12 hours/day            | 300 (14.1)                         | 176 (13.9)                       | 84 (11.8)                       | 90 (7.3)                            |                      |
| ≥12 hours/day                 | 983 (46.3)                         | 596 (47.0)                       | 184 (25.8)                      | 170 (13.7)                          |                      |
| Age ( $\bar{x}\pm s$ , years) | 19.92±1.27                         | 19.69±1.16                       | 19.46±1.29                      | 19.03±1.17                          | 54.227 <sup>3</sup>  |

\* Categorical variables were tested by Pearson chi-square tests, and continuous variables were tested by one-way ANOVA tests (i.e., age and the frequency of transport-related PA) or Kruskal-Wallis tests (except for age and the frequency of transport-related PA); <sup>1</sup>  $P<0.05$ ; <sup>2</sup>  $P<0.01$ ; <sup>3</sup>  $P<0.001$ ; PARI, physical activity-related injury; VPA, vigorous-intensity physical activity; MPA, moderate-intensity physical activity.
