# Supplementary material
Source: HighWire-hosted journal article supplement (https://bmjopen.bmj.com/content/10/12/e040865)
Supplement: inline-supplementary-material-4 [file inline-supplementary-material-4.pdf]

Supplementary Table S4 Comparison of all related variables among university students in different cities

| Characteristics           | Shantou<br>(n=2123) | Jinan<br>(n=1267) | Xi'an<br>(n=714) | Nanchang<br>(n=1237) | $\chi^2/F^*$         |
|---------------------------|---------------------|-------------------|------------------|----------------------|----------------------|
|                           | $\bar{x}\pm s$      | $\bar{x}\pm s$    | $\bar{x}\pm s$   | $\bar{x}\pm s$       |                      |
| Domestic/work/study       |                     |                   |                  |                      |                      |
| VPA                       |                     |                   |                  |                      |                      |
| Frequency, day/week       | 0.49±1.21           | 0.65±1.36         | 0.69±1.37        | 0.71±1.27            | 110.025 <sup>3</sup> |
| Duration, min/day         | 9.54±30.39          | 11.95±26.86       | 14.55±33.39      | 8.89±27.25           | 87.325 <sup>3</sup>  |
| MPA                       |                     |                   |                  |                      |                      |
| Frequency, day/week       | 1.37±1.80           | 1.39±1.82         | 1.50±1.81        | 1.56±1.85            | 39.878 <sup>3</sup>  |
| Duration, min/day         | 22.04±46.98         | 20.96±28.38       | 21.26±34.46      | 14.97±19.79          | 28.091 <sup>3</sup>  |
| Transportation            |                     |                   |                  |                      |                      |
| Frequency, day/week       | 4.19±2.68           | 4.19±2.72         | 2.96±2.45        | 3.35±2.64            | 63.323 <sup>3</sup>  |
| Duration, min/day         | 33.48±37.86         | 36.06±36.29       | 45.62±73.68      | 31.18±36.82          | 20.658 <sup>3</sup>  |
| Sports and leisure time   |                     |                   |                  |                      |                      |
| VPA                       |                     |                   |                  |                      |                      |
| Frequency, day/week       | 0.66±1.33           | 0.91±1.59         | 0.72±1.32        | 0.69±1.32            | 31.724 <sup>3</sup>  |
| Duration, min/day         | 13.43±28.85         | 18.12±30.86       | 16.68±32.85      | 9.92±22.76           | 41.852 <sup>2</sup>  |
| MPA                       |                     |                   |                  |                      |                      |
| Frequency, day/week       | 1.29±1.79           | 1.73±2.03         | 1.38±1.77        | 1.00±1.67            | 112.709 <sup>3</sup> |
| Duration, min/day         | 19.49±31.62         | 25.21±39.45       | 21.99±35.78      | 10.32±19.76          | 181.535 <sup>3</sup> |
| Age (years)               | 19.92±1.27          | 19.69±1.16        | 19.46±1.29       | 19.03±1.17           | 54.227 <sup>3</sup>  |
|                           | n (%)               | n (%)             | n (%)            | n (%)                |                      |
| Grade                     |                     |                   |                  |                      | 515.974 <sup>3</sup> |
| Year 1                    | 698 (32.9)          | 453 (35.8)        | 432 (60.5)       | 791 (63.9)           |                      |
| Year 2                    | 691 (32.5)          | 443 (35.0)        | 180 (25.2)       | 344 (27.8)           |                      |
| Year 3                    | 734 (34.6)          | 371 (29.3)        | 102 (14.3)       | 102 (8.2)            |                      |
| Gender                    |                     |                   |                  |                      | 441.055 <sup>3</sup> |
| Male                      | 569 (26.8)          | 337 (26.6)        | 165 (23.1)       | 719 (58.1)           |                      |
| Female                    | 1554 (73.2)         | 930 (73.4)        | 549 (76.9)       | 518 (41.9)           |                      |
| Residence type            |                     |                   |                  |                      | 204.376 <sup>3</sup> |
| Dormitory                 | 1511 (71.2)         | 1050 (82.9)       | 393 (55.0)       | 816 (66.0)           |                      |
| Home                      | 587 (27.6)          | 210 (16.6)        | 309 (43.3)       | 385 (31.1)           |                      |
| Other                     | 25 (1.2)            | 7 (0.6)           | 12 (1.7)         | 36 (2.9)             |                      |
| Sports team member        |                     |                   |                  |                      | 16.045 <sup>2</sup>  |
| No                        | 1861 (87.7)         | 1096 (86.5)       | 659 (92.3)       | 1098 (88.8)          |                      |
| Yes                       | 262 (12.3)          | 171 (13.5)        | 55 (7.7)         | 139 (11.2)           |                      |
| Chronic disease/symptom   |                     |                   |                  |                      | 72.979 <sup>3</sup>  |
| No                        | 2028 (95.5)         | 1226 (96.8)       | 681 (95.4)       | 1109 (89.7)          |                      |
| Yes                       | 95 (4.5)            | 41 (3.2)          | 33 (4.6)         | 128 (10.3)           |                      |
| Sleep duration, n (%)     |                     |                   |                  |                      | 193.604 <sup>1</sup> |
| <6 hours/day              | 110 (5.2)           | 58 (4.6)          | 68 (9.5)         | 152 (12.3)           |                      |
| 6 to <7 hours/day         | 365 (17.2)          | 158 (12.5)        | 70 (9.8)         | 264 (21.3)           |                      |
| 7 to <8 hours/day         | 841 (39.6)          | 608 (48.0)        | 260 (36.4)       | 444 (35.9)           |                      |
| 8 to <9 hours/day         | 563 (26.5)          | 353 (27.9)        | 236 (33.1)       | 288 (23.3)           |                      |
| ≥9 hours/day              | 244 (11.5)          | 90 (7.0)          | 80 (11.2)        | 89 (7.2)             |                      |
| Sedentary behavior, n (%) |                     |                   |                  |                      | 748.383 <sup>3</sup> |
| <4 hours/day              | 537 (25.3)          | 298 (23.5)        | 306 (42.9)       | 792 (64.0)           |                      |
| 4 to <6 hours/day         | 157 (7.4)           | 79 (6.2)          | 62 (8.7)         | 99 (8.0)             |                      |
| 6 to <9 hours/day         | 146 (6.9)           | 118 (9.3)         | 78 (10.9)        | 86 (7.0)             |                      |
| 9 to <12 hours/day        | 300 (14.1)          | 176 (13.9)        | 84 (11.8)        | 90 (7.3)             |                      |
| ≥12 hours/day             | 983 (46.3)          | 596 (47.0)        | 184 (25.8)       | 170 (13.7)           |                      |

\* Categorical variables were tested by Pearson chi-square tests, and continuous variables were tested by one-way ANOVA tests (i.e., age and the frequency of transport-related PA) or Kruskal-Wallis tests (except for age and the frequency of transport-related PA); <sup>1</sup>  $P<0.05$ ; <sup>2</sup>  $P<0.01$ ; <sup>3</sup>  $P<0.001$ ; PARI, physical activity-related injury; VPA, vigorous-intensity physical activity; MPA, moderate-intensity physical activity.
